# Supplementary material
Source: publisher site journal article supplement (https://www.dovepress.com/article/423207)
Supplement: Supplementary file 1 [file get_supplementary_file.php]

**Addendum Measuring adherence to pulmonary rehabilitation: a prospective validation study of the Dutch version of the Rehabilitation Adherence Measure for Athletic Training (RAdMAT-NL)**

**Additional file 1: Flowchart**

**Additional file 2: Characteristics physiotherapists**

**Additional file 1: Flowchart**


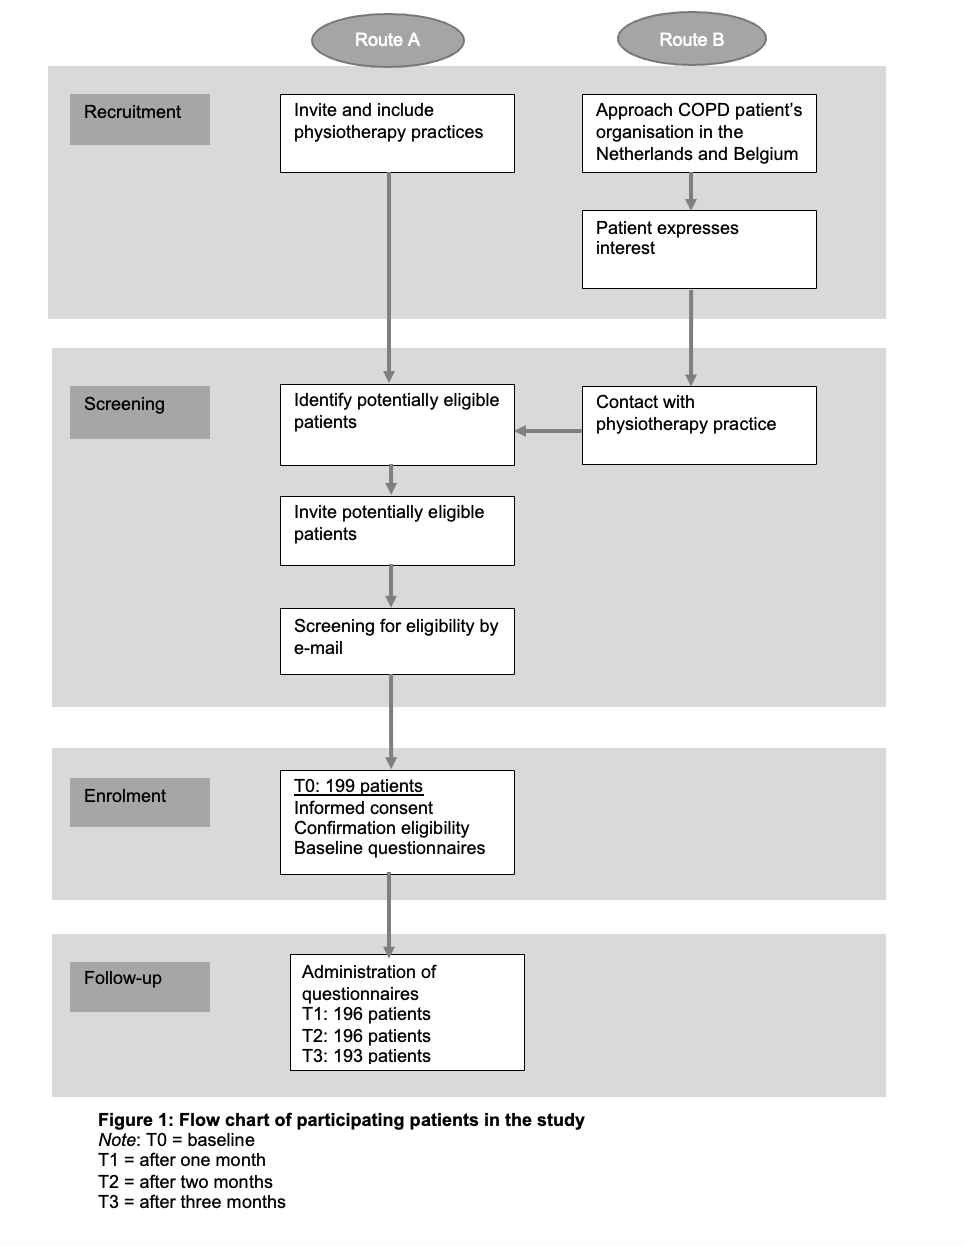


**Additional file 2:** **Characteristics physiotherapists (n = 53)**

| **Demographic characteristics** |  |
| --- | --- |
| Male gender (%) | 54.7 |
| Age (%)   - < 25 years - 26-35 years - 36-45 years - 46-55 years - 56-65 years - > 65 years | 0  28.3  37.7  15.1  18.9  0 |
| Completed Master’s degree (%)   - Yes - No, but currently working on it - No | 37.7  3.8  58.5 |
| Years of professional experience   - < 5 years - 6-15 years - 16-25 years - > 25 years | 11.3  34.0  35.8  18.9 |
